# Supplementary material for: Association between socioeconomic status and chronic obstructive pulmonary disease in Jiangsu province, China: a population-based study
Source: PubMed Central journal article supplement — Chin Med J (Engl). 2021 Jun 22;134(13):1552–60. doi: 10.1097/CM9.0000000000001609 (PMC8280072; doi:10.1097/cm9.0000000000001609), 2021-06-22
Supplement: cm9-134-1552-s001.pdf [file cm9-134-1552-s001.pdf]

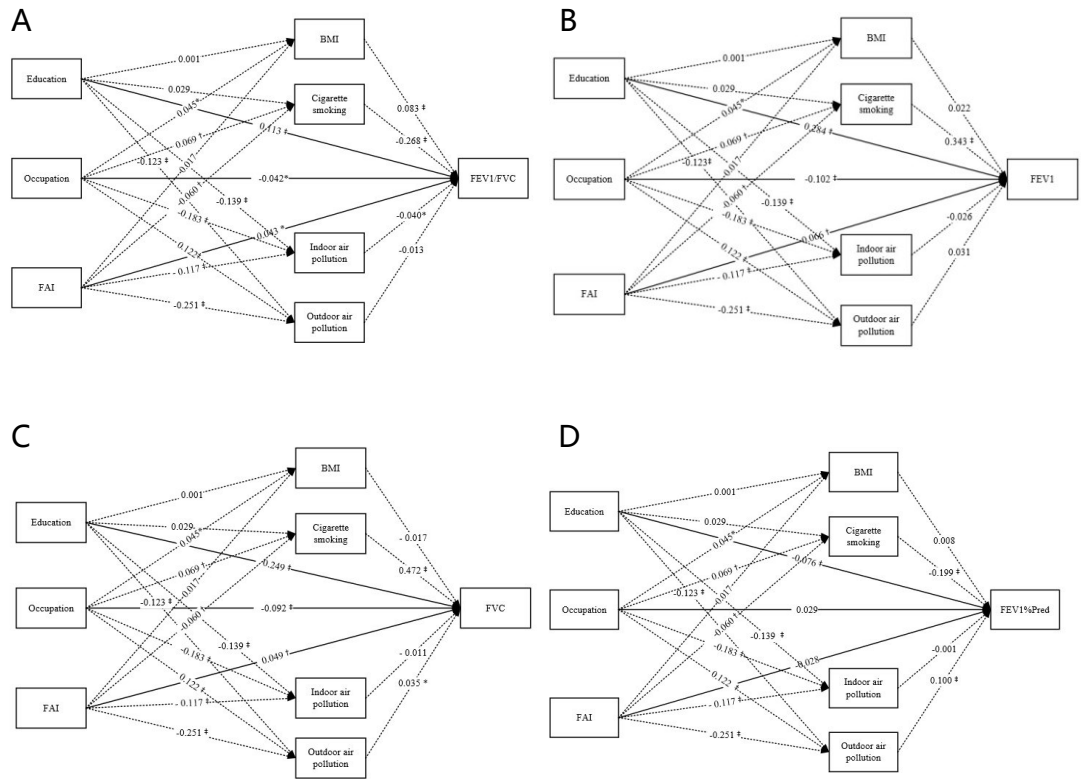

Figure 1: Path model for the effects of socioeconomic status (SES) on pulmonary function indexes. Direct and indirect effects of education, occupation and FAI on FEV<sub>1</sub>/FVC (A), FEV<sub>1</sub> (B), FVC (C) and FEV<sub>1</sub>% pred (D). Direct effects are represented by solid arrows; indirect effects are represented by dotted arrows. The  $\beta$  values are shown between two items. \* $P$ <0.05, † $P$ <0.01, ‡ $P$ <0.001. BMI: Body mass index; FAI: Family average income; FVC: Forced vital capacity; FEV<sub>1</sub>: Forced expiratory volume in one second; FEV<sub>1</sub>% pred: FEV<sub>1</sub> percentage of predicted.
